# Supplementary material
Source: ML conference proceedings conference paper supplement (https://openreview.net/forum?id=M4Rv8VEi0x)
Supplement: supplementary_material [file attachment]

# **ArcticBench and SmartTransfer: Benchmarking and Enabling Continual Learning of Atmosphere Generative Foundation Model**

Supplementary Material

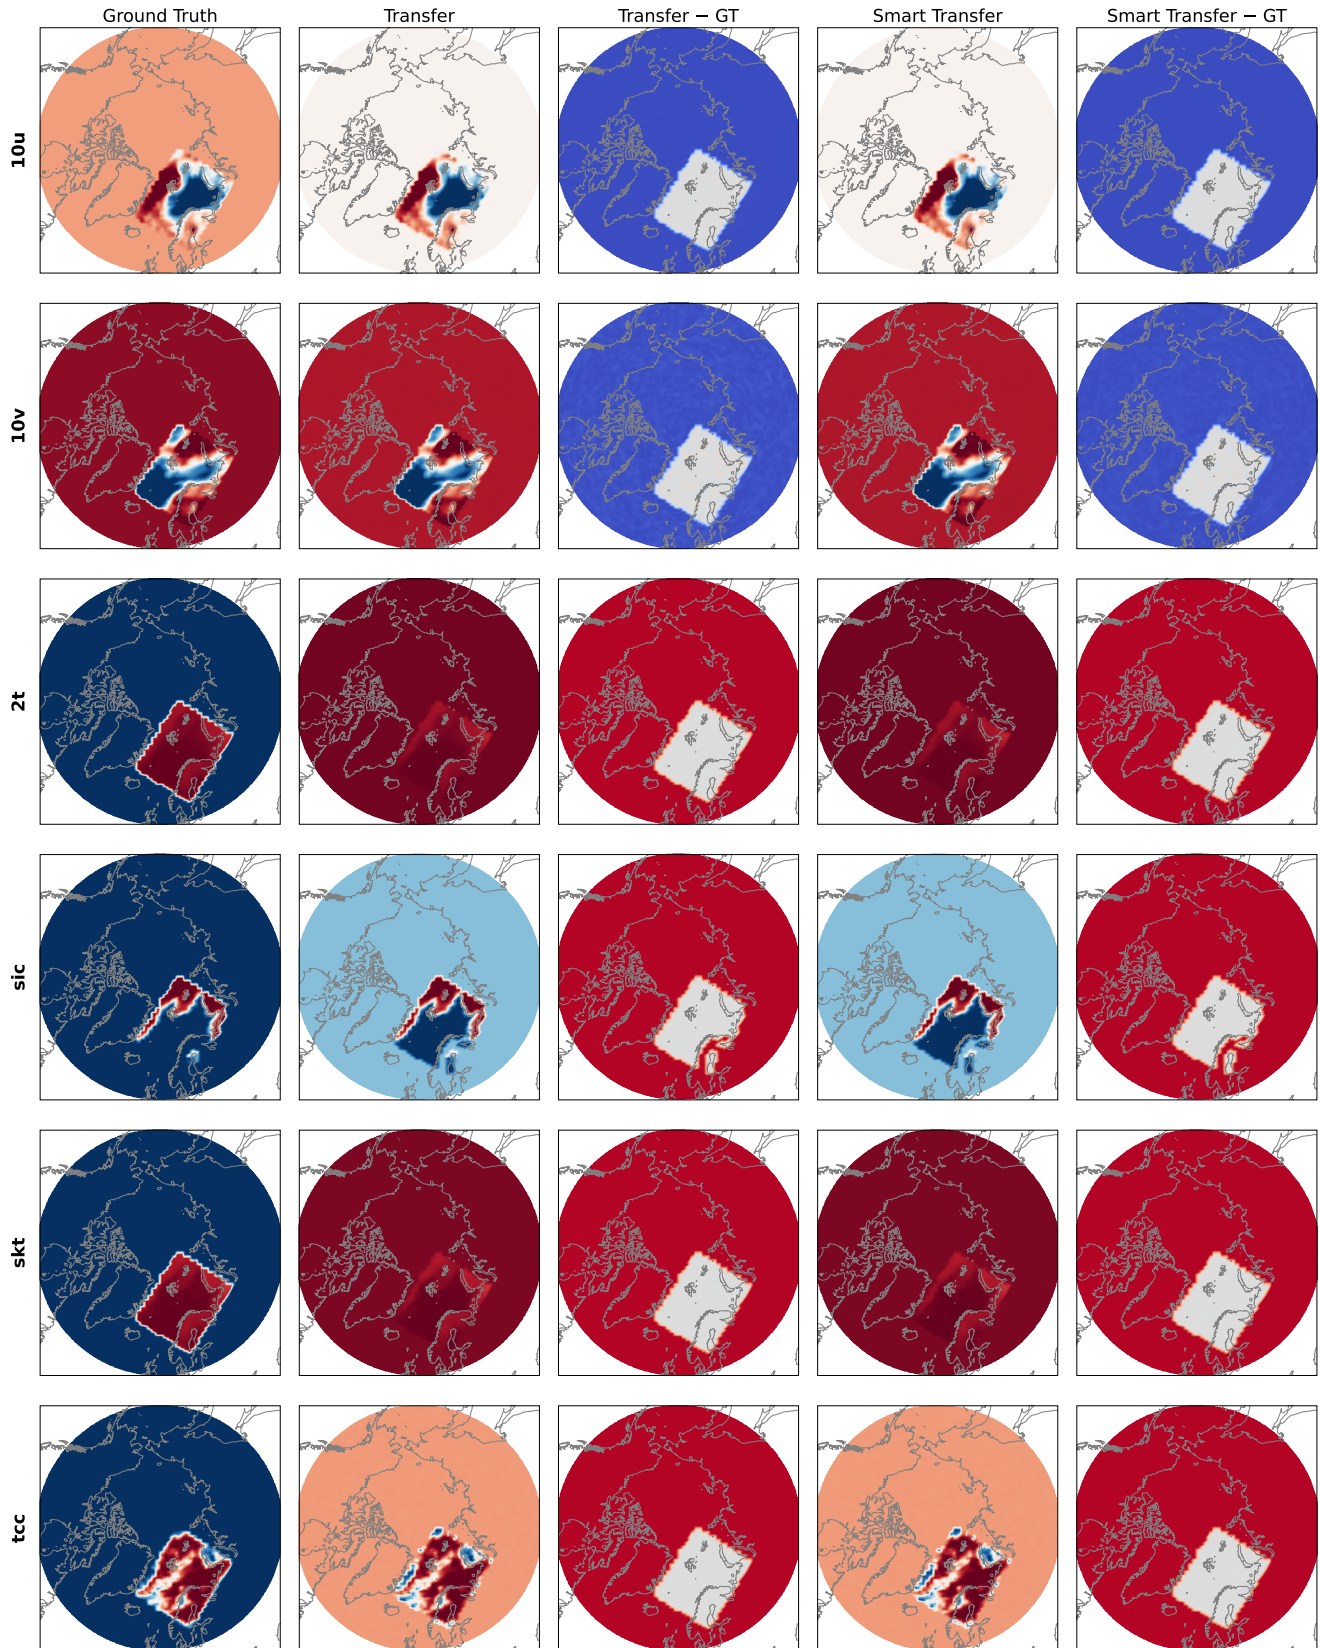

Figure 1. ArcticBench Evaluation of Transfer and Smart Transfer using Atmosphere Foundation Model
